# Supplementary material
Source: publisher site journal article supplement (https://www.dovepress.com/article/417553)
Supplement: Supplementary file 1 [file get_supplementary_file.php]

**Supplementary Table 1：Analysis of the selected clinical indicators in the development cohort set and validation cohort set**

|  | Development cohort (*N*=98) | Validation cohort  (*N*=43） | *P* value |
| --- | --- | --- | --- |
| N (mean ± SD) | 84.4 ± 10.5 | 86.0 ± 8.6 | 0.392 |
| TBIL (mean ± SD) | 24.3 ± 26.8 | 22.2 ± 18.7 | 0.637 |
| APACHE II (mean ± SD) | 20.3 ± 7.6 | 19.4 ± 7.4 | 0.523 |
| WPRN (*n*, %)  No  Yes | 34 (34.7%)  64 (65.3%) | 12 (27.9%)  31 (72.1%) | 0.551 |
| WTOST (*n*, %)  No  Yes | 83 (84.7%)  15 (15.3%) | 38 (88.4%)  5 (11.6%) | 0.753 |
| DMV (mean ± SD) | 4.7 ± 7.8) | 4.0 ± 6.4 | 0.604 |
